# Supplementary material for: A Green and Effective Polyethylene Glycols-Based Microwave-Assisted Extraction of Carnosic and Rosmarinic Acids from Rosmarinus officinalis Leaves
Source: MDPI journal article supplement (doi:10.3390/foods12091761), 2023-04-24
Supplement: s1 [file s1]

# **A Green and Effective Polyethylene Glycols-Based Microwave-Assisted Extraction of Carnosic and Rosmarinic Acids from *Rosmarinus Officinalis* Leaves**

**Chunyan Zhu<sup>1</sup>, Yunchang Fan<sup>1,\*</sup> and Xiujun Bai<sup>2</sup>**

<sup>1</sup>College of Chemistry and Chemical Engineering, Henan Polytechnic University,  
Jiaozuo 454003, China

<sup>2</sup>Shijiazhuang ENN gas Co., Ltd., Shijiazhuang, 050081, China

\* Corresponding author. E-mail address: fanyunchang@hpu.edu.cn

**Table S1.** Results of regression analysis of the second-order polynomial models for the optimization of the extraction of CA and RA.

| Term           | Coefficients Estimated | <i>p</i> -Value | <i>t</i> -Value |
|----------------|------------------------|-----------------|-----------------|
| <b>RA</b>      |                        |                 |                 |
| Intercept      | 1.34                   | < 0.0001*       | 25.56           |
| A              | −0.014                 | 0.378           | −0.92           |
| B              | −0.016                 | 0.288           | −1.12           |
| C              | 0.016                  | 0.300           | 1.09            |
| D              | 0.046                  | 0.008*          | 3.29            |
| AB             | 0.0025                 | 0.910           | 0.12            |
| AC             | 0.018                  | 0.439           | 0.81            |
| AD             | 0.0058                 | 0.796           | 0.27            |
| BC             | −0.038                 | 0.111           | −1.75           |
| BD             | −0.036                 | 0.118           | −1.71           |
| CD             | 0.016                  | 0.484           | 0.73            |
| A <sup>2</sup> | −0.026                 | 0.366           | −0.95           |
| B <sup>2</sup> | 0.0052                 | 0.872           | 0.17            |
| C <sup>2</sup> | −0.038                 | 0.198           | −1.38           |
| D <sup>2</sup> | −0.17                  | < 0.0001*       | −5.56           |
| <b>CA</b>      |                        |                 |                 |
| Intercept      | 2.64                   | < 0.0001*       | 17.14           |
| A              | 0.22                   | 0.001*          | 4.91            |
| B              | 0.064                  | 0.155           | 1.54            |
| C              | 0.26                   | < 0.0001*       | 5.89            |
| D              | −0.077                 | 0.092           | −1.86           |
| AB             | −0.0078                | 0.905           | −0.12           |
| AC             | −0.030                 | 0.660           | −0.45           |
| AD             | −0.16                  | 0.031*          | −2.52           |
| BC             | −0.12                  | 0.086           | −1.91           |
| BD             | −0.034                 | 0.598           | −0.55           |
| CD             | −0.028                 | 0.666           | −0.44           |
| A <sup>2</sup> | −0.42                  | < 0.0001*       | −5.30           |
| B <sup>2</sup> | −0.17                  | 0.095           | −1.85           |
| C <sup>2</sup> | −0.45                  | < 0.0001*       | −5.56           |
| D <sup>2</sup> | −0.21                  | 0.045*          | −2.29           |

\*Significant ( $p < 0.05$ ).

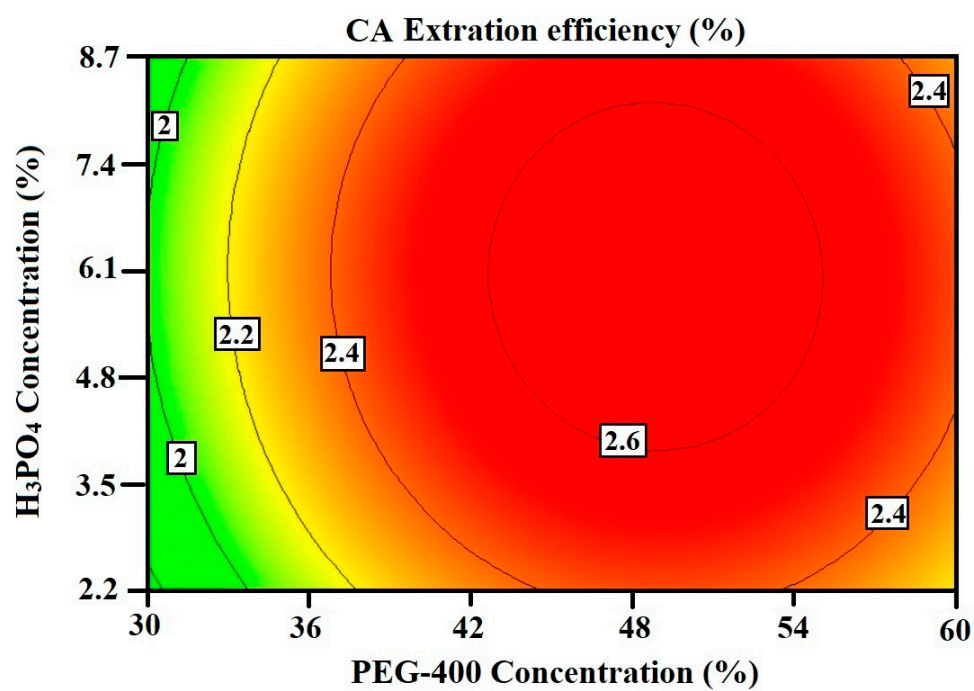

**Figure S1.** Contour plot of the interactive effects of PEG-400 concentration and H<sub>3</sub>PO<sub>4</sub> concentration on the extraction of CA.

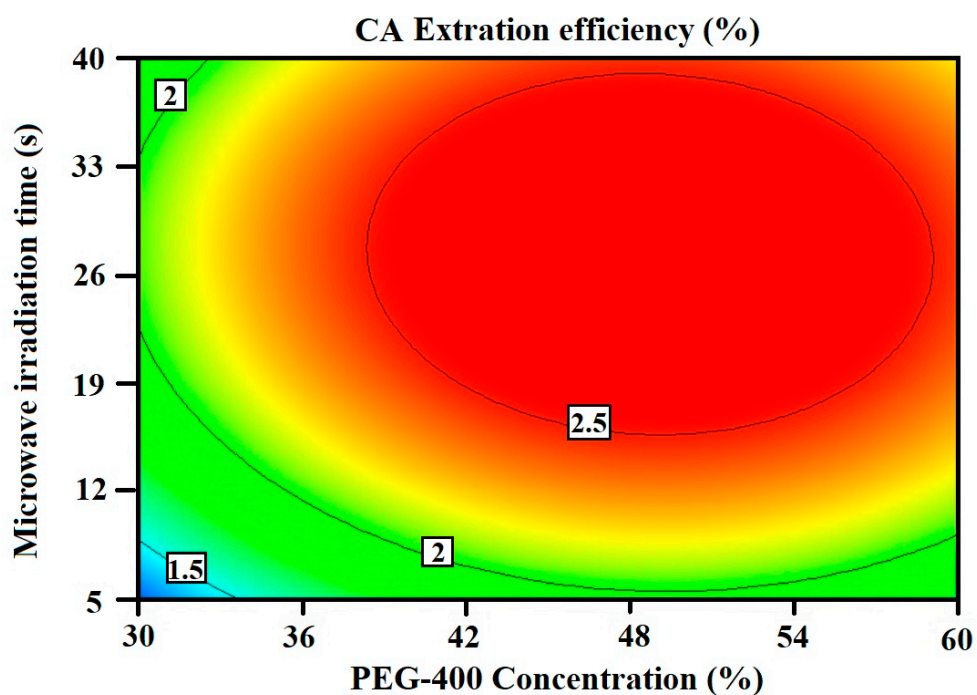

**Figure S2.** Contour plot of the interactive effects of PEG-400 concentration and microwave irradiation time on the extraction of CA.

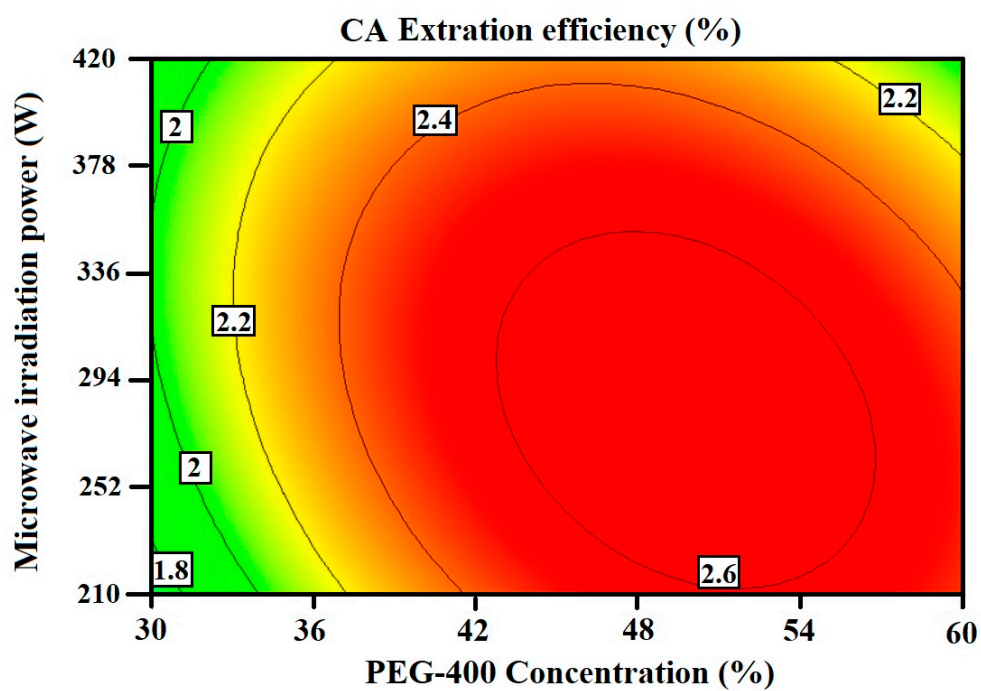

**Figure S3.** Contour plot of the interactive effects of PEG-400 concentration and microwave irradiation power on the extraction of CA.

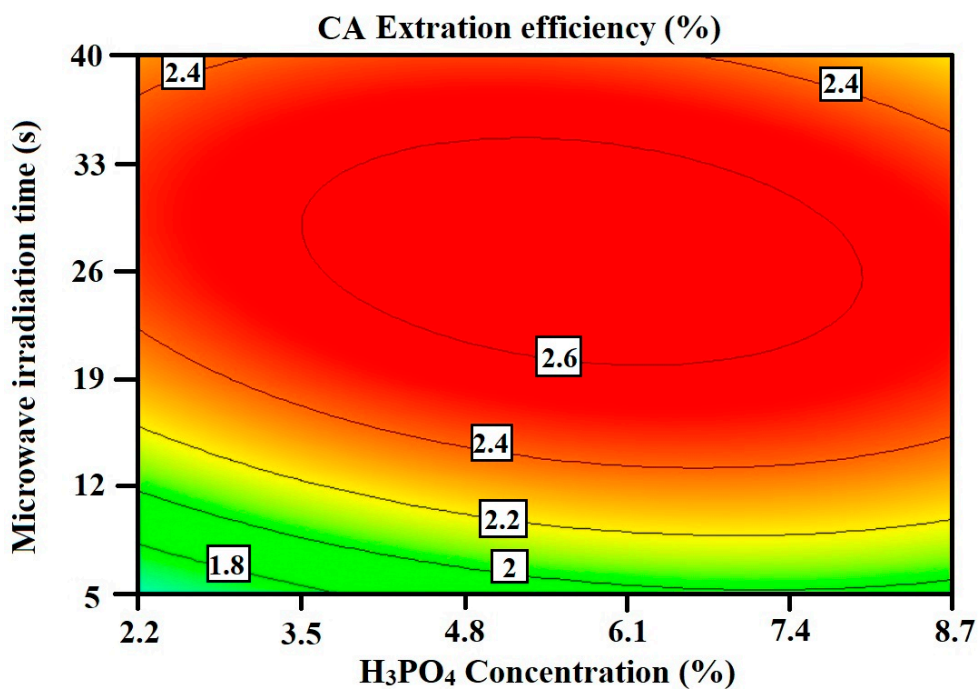

**Figure S4.** Contour plot of the interactive effects of H<sub>3</sub>PO<sub>4</sub> concentration and microwave irradiation time on the extraction of CA.

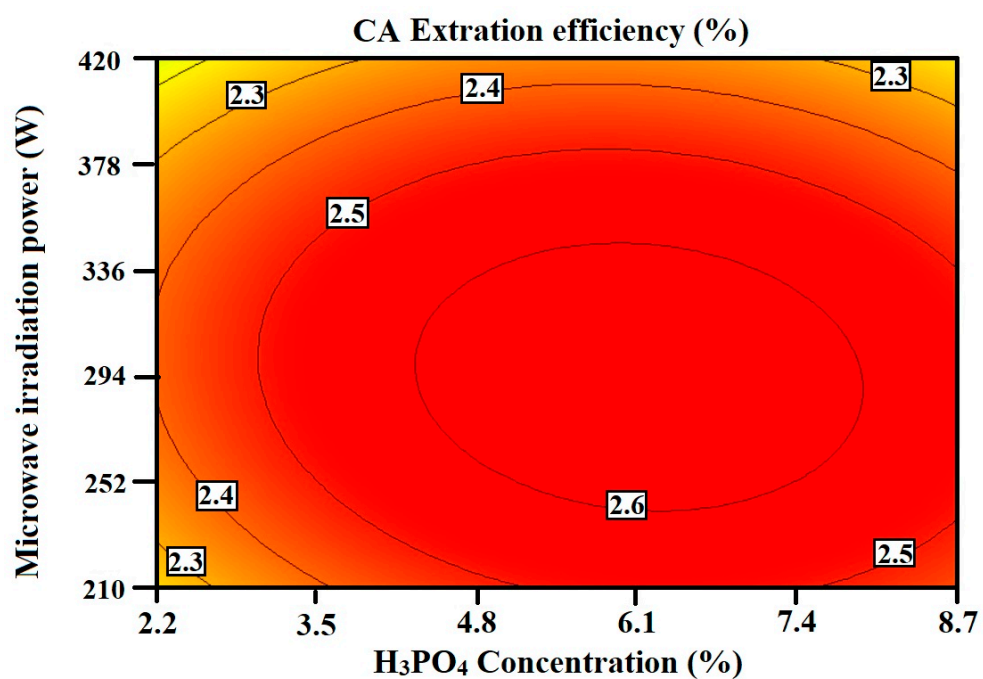

**Figure S5.** Contour plot of the interactive effects of  $\text{H}_3\text{PO}_4$  concentration and microwave irradiation power on the extraction of CA.

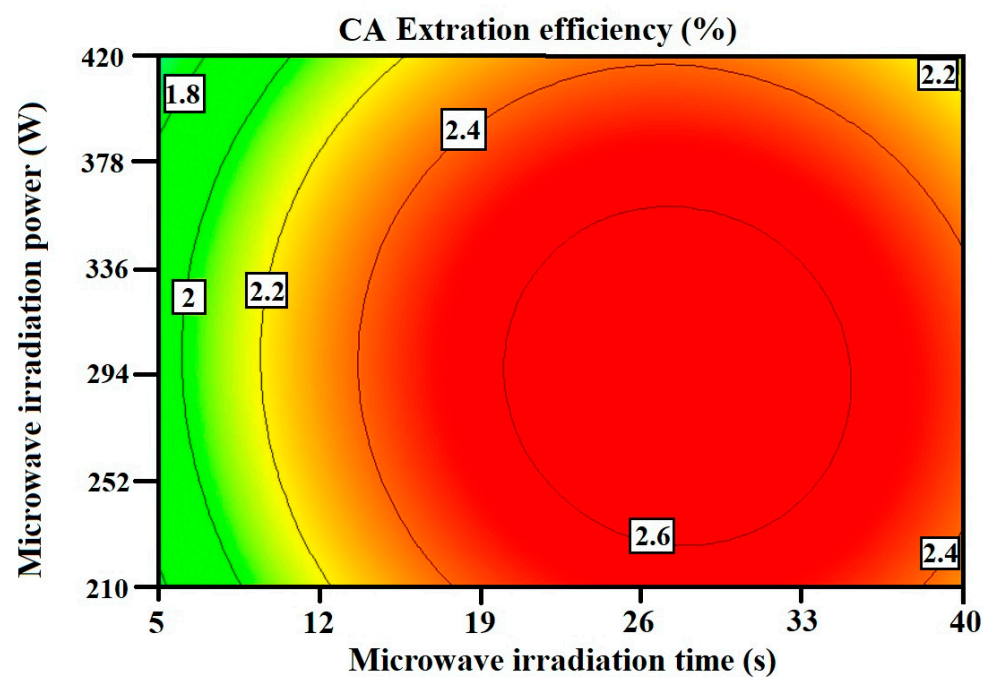

**Figure S6.** Contour plot of the interactive effects of microwave irradiation time and microwave irradiation power on the extraction of CA.

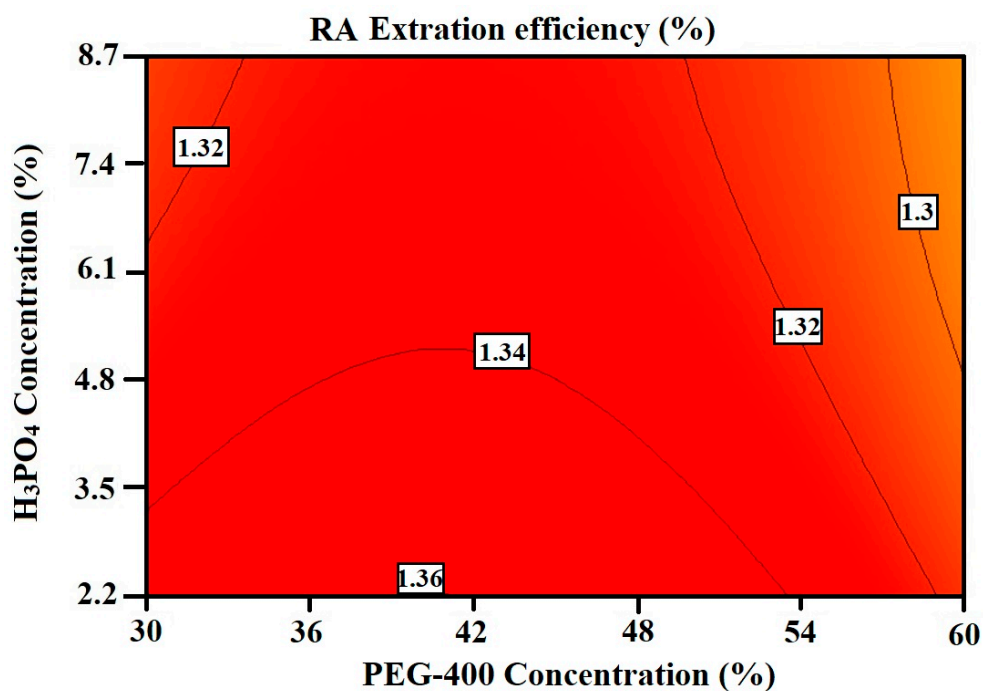

**Figure S7.** Contour plot of the interactive effects of PEG-400 concentration and H<sub>3</sub>PO<sub>4</sub> concentration on the extraction of RA.

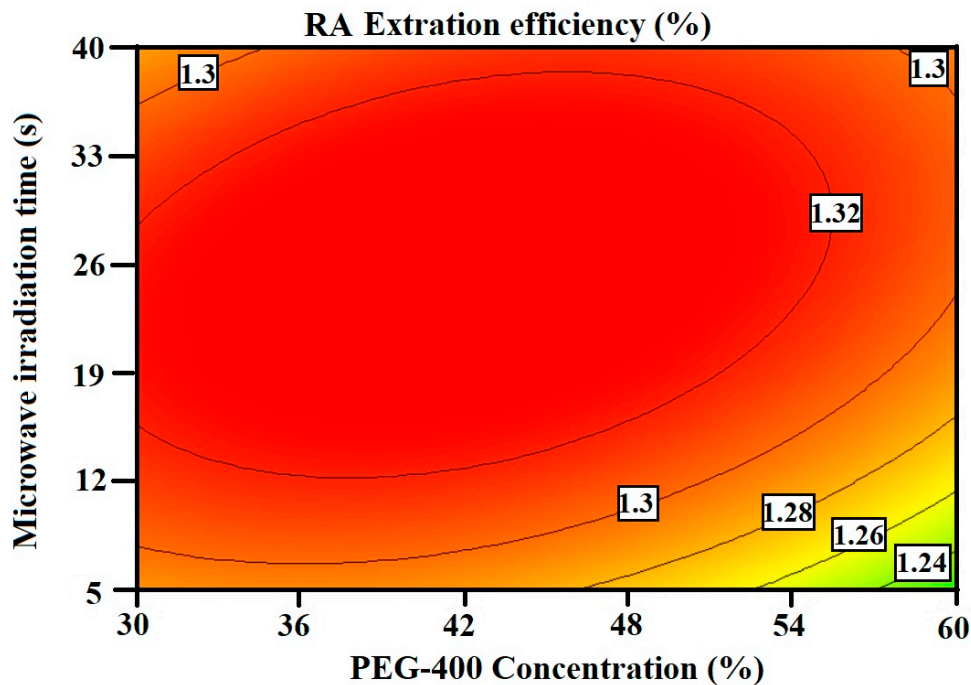

**Figure S8.** Contour plot of the interactive effects of PEG-400 concentration and microwave irradiation time on the extraction of RA.

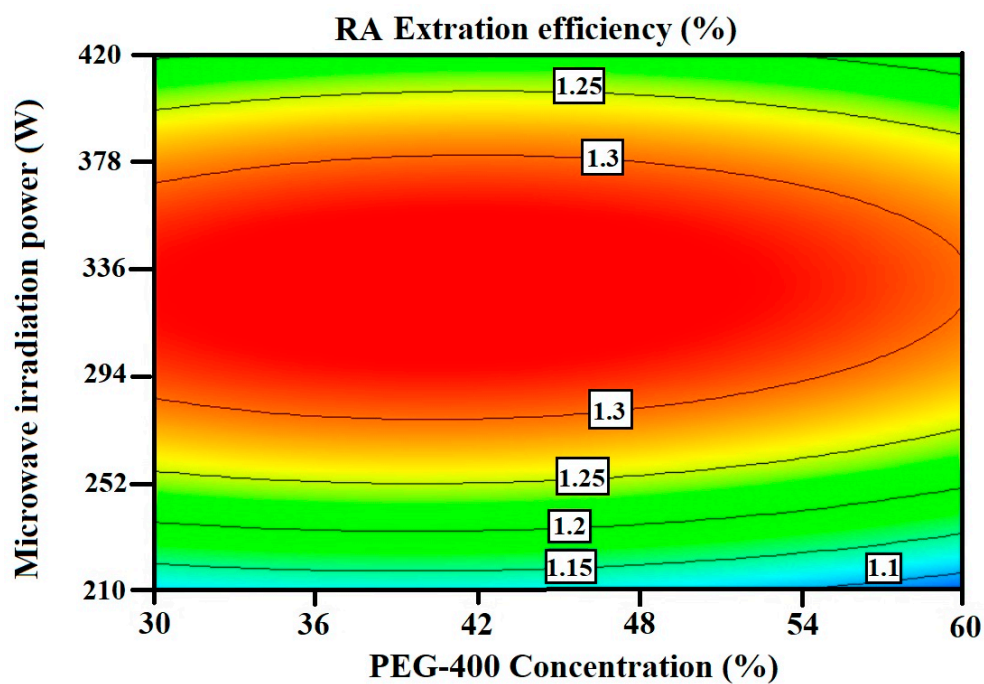

**Figure S9.** Contour plot of the interactive effects of PEG-400 concentration and microwave irradiation power on the extraction of RA.

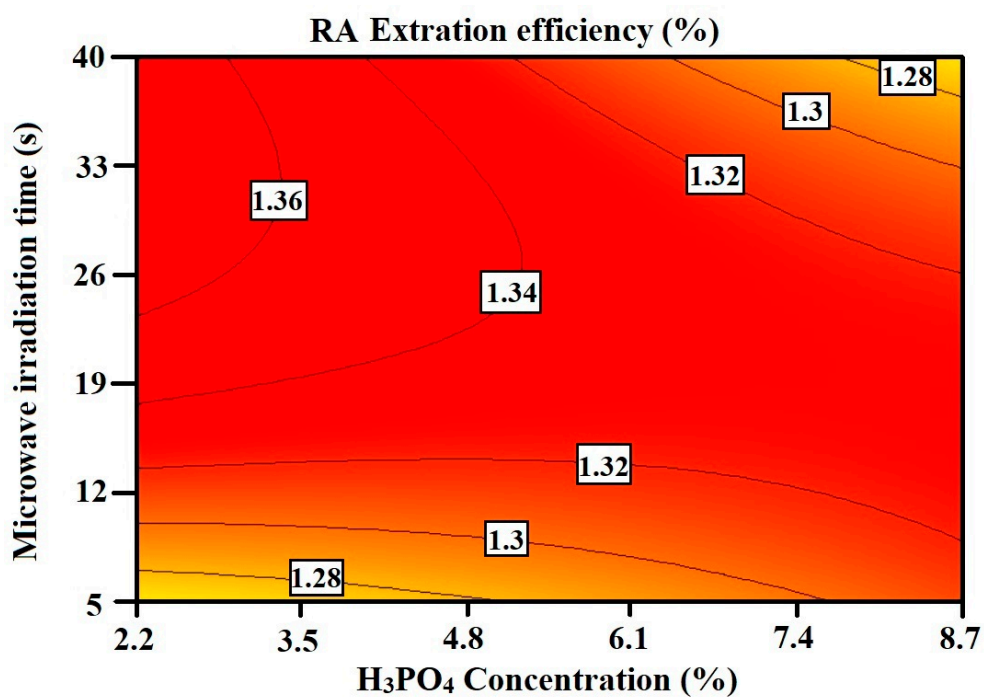

**Figure S10.** Contour plot of the interactive effects of H<sub>3</sub>PO<sub>4</sub> concentration and microwave irradiation time on the extraction of RA.



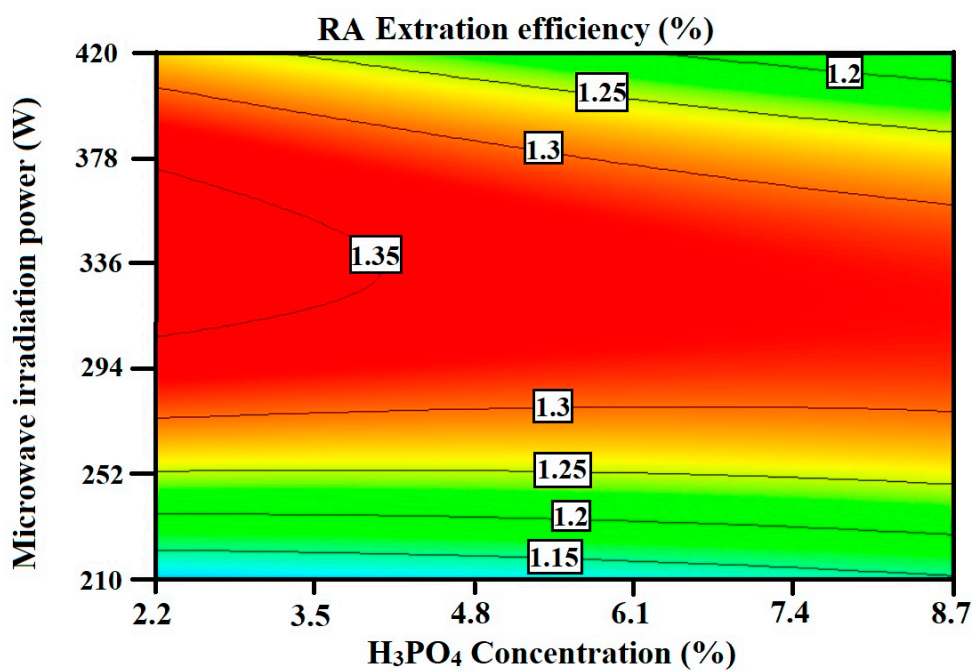

**Figure S11.** Contour plot of the interactive effects of  $\text{H}_3\text{PO}_4$  concentration and microwave irradiation power on the extraction of RA.

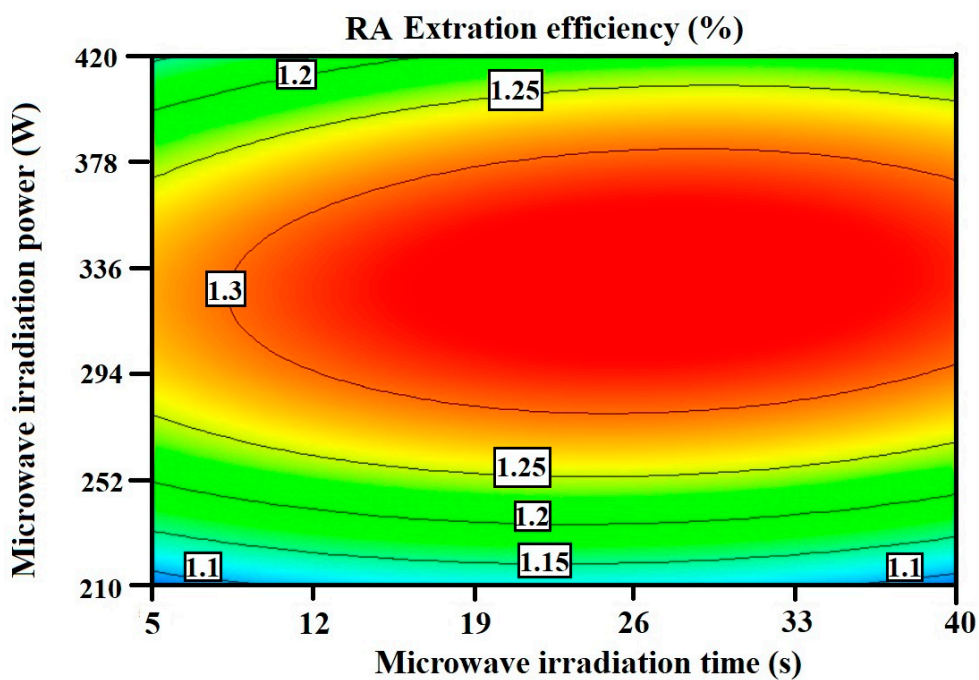

**Figure S12.** Contour plot of the interactive effects of microwave irradiation time and microwave irradiation power on the extraction of RA.
